# Supplementary material for: An Efficient Catalyst Prepared from Residual Kaolin for the Esterification of Distillate from the Deodorization of Palm Oil
Source: MDPI journal article supplement (doi:10.3390/catal11050604), 2021-05-07
Supplement: s1 [file s1]

## *Supplementary Material*

# **An Efficient Catalyst Prepared from Residual Kaolin for the Esterification of Distillate from the Deodorization of Palm Oil**

Alex de Nazaré de Oliveira <sup>1,2,4</sup>; Irlon Maciel Ferreira <sup>4</sup>; David Esteban Quintero Jimenez <sup>4</sup>; Fernando Batista Neves <sup>4</sup>; Linéia Soares da Silva <sup>5</sup>; Ana Alice Farias da Costa <sup>1,2</sup>; Erika Tallyta Leite Lima <sup>1,2</sup>; Luíza Helena de Oliveira Pires <sup>3</sup>; Carlos Emmersom Ferreira da Costa <sup>1,2</sup>; Geraldo Narciso da Rocha Filho <sup>1,2</sup>; Luís Adriano Santos do Nascimento <sup>1,2</sup>.

<sup>1</sup> Graduation Program in Chemistry, Federal University of Pará, Augusto Corrêa Street, Guamá, Belém PA 66075-110, Brazil; alexoliveiraquimica@hotmail.com (A.d.N.d.O.); analilice@hotmail.com (A.A.F.d.C.); erikatallyta@hotmail.com (E.T.L.L.); geraldonrf@gmail.com (G.N.d.R.F.); emmerson@ufpa.br (C.E.F.d.C.);

<sup>2</sup> Laboratory of Oils of the Amazon, Federal University of Pará, Belém PA 66075-750, Brazil

<sup>3</sup> High School of Application, University of Pará, Belém, Belém, Pará CEP 66095-780, Brazil; lulenapires@hotmail.com (L.H.d.O.P.)

<sup>4</sup> Laboratory of Biocatalysts and Applied Organic Synthesis Group, Chemistry Course, Federal University of Amapá, Campus University Marco Zero of Equador, Rodovia Juscelino Kubitschek de Oliveira Km 02, Zerão, Macapá, AP, 68902-280, Brazil; irlon.ferreira@gmail.com (I.M.F.); derteriom@gmail.com (D.E.Q.J.); fertista3798@gmail.com (F.B.N.)

<sup>5</sup> Federal Institute of Education, Science and Technology of Amapá, Macapá AP 68909-398, Brazil; dasilvalineia@gmail.com (L.S.d.S.)

\* Correspondence: adrlui1@yahoo.com.br (L.A.S.d.N.); Tel.: +55-91-98171-4947

Elemental analysis by XRF of Table 2

SAMPLE:10HPMo/AlSiM

| Measurement Condition |          |                |            |                    |             |      |
|-----------------------|----------|----------------|------------|--------------------|-------------|------|
| -----                 |          |                |            |                    |             |      |
| Instrument: EDX-700   |          | Atmosphere: He |            | Collimator: 10(mm) |             |      |
| -----                 |          |                |            |                    |             |      |
| Analyte               | TG kV    | uA             | FI         | Acq. (keV)         | Anal. (keV) |      |
| -----                 |          |                |            |                    |             |      |
| Ti-U                  | Rh 50    | 15-Auto        | --         | 0 - 40             | 0.0 -       | 40.0 |
| Na-Sc                 | Rh 15    | 258-Auto       | --         | 0 - 20             | 0.0 -       | 4.4  |
| -----                 |          |                |            |                    |             |      |
| Quantitative Result   |          |                |            |                    |             |      |
| -----                 |          |                |            |                    |             |      |
| Analyte               | Result   |                | (Std.Dev.) | Proc.-Calc         |             |      |
| -----                 |          |                |            |                    |             |      |
| Si02                  | 83.220 % |                | ( 0.238)   | Quan-FP            |             |      |
| Mo03                  | 7.398 %  |                | ( 0.019)   | Quan-FP            |             |      |
| Al203                 | 3.632 %  |                | ( 0.135)   | Quan-FP            |             |      |
| Fe203                 | 2.602 %  |                | ( 0.029)   | Quan-FP            |             |      |
| Ti02                  | 2.575 %  |                | ( 0.057)   | Quan-FP            |             |      |
| P205                  | 0.572 %  |                | ( 0.055)   | Quan-FP            |             |      |

SAMPLE: 10HPMo/AlSiM R1

| Measurement Condition |          |                |               |                    |  |  |
|-----------------------|----------|----------------|---------------|--------------------|--|--|
| Instrument: EDX-700   |          | Atmosphere: He |               | Collimator: 10(mm) |  |  |
| Analyte               | TG kV    | uA             | FI Acq. (keV) | Anal. (keV)        |  |  |
| Ti-U                  | Rh 50    | 15-Auto        | -- 0 - 40     | 0.0 - 40.0         |  |  |
| Na-Sc                 | Rh 15    | 258-Auto       | -- 0 - 20     | 0.0 - 4.4          |  |  |
| Quantitative Result   |          |                |               |                    |  |  |
| Analyte               | Result   |                | (Std.Dev.)    | Proc.-Calc         |  |  |
| SiO2                  | 83.252 % |                | ( 0.238)      | Quan-FP            |  |  |
| MoO3                  | 7.365 %  |                | ( 0.019)      | Quan-FP            |  |  |
| Al2O3                 | 3.633 %  |                | ( 0.135)      | Quan-FP            |  |  |
| Fe2O3                 | 2.602 %  |                | ( 0.029)      | Quan-FP            |  |  |
| TiO2                  | 2.575 %  |                | ( 0.057)      | Quan-FP            |  |  |
| P2O5                  | 0.573 %  |                | ( 0.055)      | Quan-FP            |  |  |

SAMPLE: 10HPMo/AlSiM R 2

| Measurement Condition |          |                |            |                    |             |  |
|-----------------------|----------|----------------|------------|--------------------|-------------|--|
| -----                 |          |                |            |                    |             |  |
| Instrument: EDX-700   |          | Atmosphere: He |            | Collimator: 10(mm) |             |  |
| -----                 |          |                |            |                    |             |  |
| Analyte               | TG kV    | uA             | FI         | Acq. (keV)         | Anal. (keV) |  |
| -----                 |          |                |            |                    |             |  |
| Ti-U                  | Rh 50    | 15-Auto        | --         | 0 - 40             | 0.0 - 40.0  |  |
| Na-Sc                 | Rh 15    | 258-Auto       | --         | 0 - 20             | 0.0 - 40.0  |  |
| -----                 |          |                |            |                    |             |  |
| Quantitative Result   |          |                |            |                    |             |  |
| -----                 |          |                |            |                    |             |  |
| Analyte               | Result   |                | (Std.Dev.) |                    | Proc.-C     |  |
| -----                 |          |                |            |                    |             |  |
| Si02                  | 83.252 % |                | ( 0.238)   |                    | Quan-FP     |  |
| Mo03                  | 7.365 %  |                | ( 0.019)   |                    | Quan-FP     |  |
| Al203                 | 3.633 %  |                | ( 0.135)   |                    | Quan-FP     |  |
| Fe203                 | 2.602 %  |                | ( 0.029)   |                    | Quan-FP     |  |
| Ti02                  | 2.575 %  |                | ( 0.057)   |                    | Quan-FP     |  |
| P205                  | 0.573 %  |                | ( 0.055)   |                    | Quan-FP     |  |

SAMPLE: 10HPMo/AlSiM R 3

| Measurement Condition |          |                |               |                    |  |  |
|-----------------------|----------|----------------|---------------|--------------------|--|--|
| <hr/>                 |          |                |               |                    |  |  |
| Instrument: EDX-700   |          | Atmosphere: He |               | Collimator: 10(mm) |  |  |
| <hr/>                 |          |                |               |                    |  |  |
| Analyte               | TG kV    | uA             | FI Acq. (keV) | Anal. (keV)        |  |  |
| <hr/>                 |          |                |               |                    |  |  |
| Ti-U                  | Rh 50    | 15-Auto        | -- 0 - 40     | 0.0 - 40.0         |  |  |
| Na-Sc                 | Rh 15    | 258-Auto       | -- 0 - 20     | 0.0 - 4.4          |  |  |
| <hr/>                 |          |                |               |                    |  |  |
| Quantitative Result   |          |                |               |                    |  |  |
| <hr/>                 |          |                |               |                    |  |  |
| Analyte               | Result   |                | (Std.Dev.)    | Proc.-Calc.        |  |  |
| <hr/>                 |          |                |               |                    |  |  |
| Si02                  | 83.302 % |                | ( 0.238)      | Quan-FP            |  |  |
| Mo03                  | 7.362 %  |                | ( 0.019)      | Quan-FP            |  |  |
| Al203                 | 3.635 %  |                | ( 0.135)      | Quan-FP            |  |  |
| Fe203                 | 2.593 %  |                | ( 0.029)      | Quan-FP            |  |  |
| Ti02                  | 2.535 %  |                | ( 0.057)      | Quan-FP            |  |  |
| P205                  | 0.573 %  |                | ( 0.055)      | Quan-FP            |  |  |

SAMPLE: 10HPMo/AlSiM R 4

| Measurement Condition |          |                |               |                    |  |  |
|-----------------------|----------|----------------|---------------|--------------------|--|--|
| -----                 |          |                |               |                    |  |  |
| Instrument: EDX-700   |          | Atmosphere: He |               | Collimator: 10(mm) |  |  |
| -----                 |          |                |               |                    |  |  |
| Analyte               | TG kV    | uA             | FI Acq. (keV) | Anal. (keV)        |  |  |
| -----                 |          |                |               |                    |  |  |
| Ti-U                  | Rh 50    | 15-Auto        | -- 0 - 40     | 0.0 - 40.0         |  |  |
| Na-Sc                 | Rh 15    | 246-Auto       | -- 0 - 20     | 0.0 - 4.4          |  |  |
| -----                 |          |                |               |                    |  |  |
| Quantitative Result   |          |                |               |                    |  |  |
| -----                 |          |                |               |                    |  |  |
| Analyte               | Result   |                | (Std.Dev.)    | Proc.-Calc         |  |  |
| -----                 |          |                |               |                    |  |  |
| Si02                  | 89.987 % |                | ( 0.232)      | Quan-FP            |  |  |
| Mo03                  | 6.043 %  |                | ( 0.015)      | Quan-FP            |  |  |
| Al203                 | 1.714 %  |                | ( 0.129)      | Quan-FP            |  |  |
| Ti02                  | 1.511 %  |                | ( 0.041)      | Quan-FP            |  |  |
| P205                  | 0.744 %  |                | ( 0.055)      | Quan-FP            |  |  |
